# Supplementary material
Source: MDPI journal article supplement (https://www.mdpi.com/1424-8247/14/10/1044)

Supplementary Materials

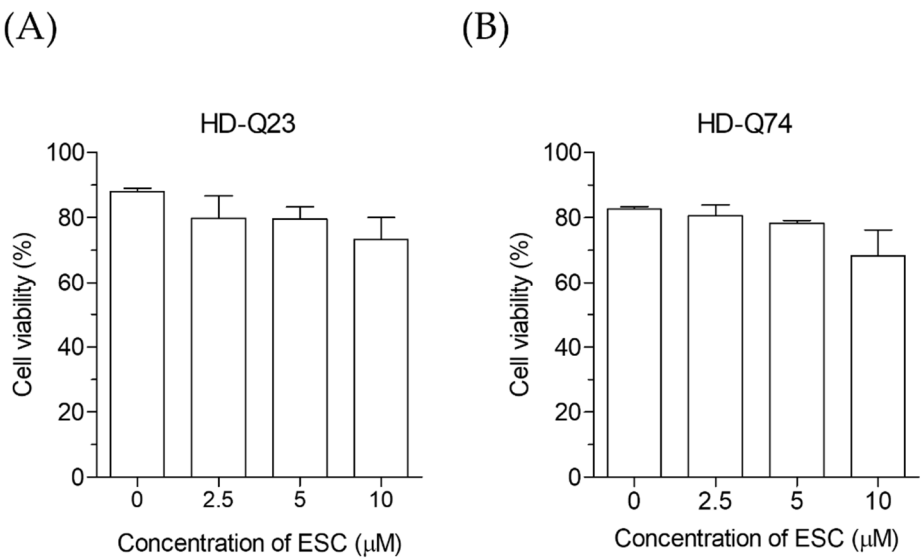

Figure S1. Neurotoxicity of ESC in HD-Q23 and HD-Q74 cells.

Supplement: s1 [file s1]
